# Supplementary material for: Single-chain crosslinked polymers via the transesterification of folded polymers: from efficient synthesis to crystallinity control
Source: Royal Society of Chemistry journal article supplement (doi:10.1039/d0py00758g), 2020-01-01
Supplement: d0py00758g1.pdf [file d0py00758g1.pdf]

## Supplementary Information

### Single-chain crosslinked polymers via the transesterification of folded polymers: from efficient synthesis to crystallinity control

Daiki Ito,<sup>1</sup> Yoshihiko Kimura,<sup>1</sup> Mikihiro Takenaka,<sup>2,3</sup> Makoto Ouchi,<sup>1</sup> and Takaya Terashima<sup>1\*</sup>

<sup>1</sup>Department of Polymer Chemistry, Graduate School of Engineering, Kyoto University, Katsura, Nishikyo-ku, Kyoto 615-8510, Japan

<sup>2</sup>Institute for Chemical Research, Kyoto University, Gokasho, Uji, Kyoto 611-0011, Japan

<sup>3</sup>RIKEN Spring-8 Center, Sayo-cho, Sayo-gun, Hyogo 679-5148, Japan

E-mail: terashima.takaya.2e@kyoto-u.ac.jp.

\*: corresponding authors

#### Contents

|                                                                                                                      |     |
|----------------------------------------------------------------------------------------------------------------------|-----|
| <b>Experimental Section</b>                                                                                          | S2  |
| <b>Supporting Data</b>                                                                                               |     |
| <b>Figure S1.</b> Living radical copolymerization of ODMA, HEMA, and MA                                              | S8  |
| <b>Table S1.</b> Synthesis of polymer precursors                                                                     | S8  |
| <b>Figure S2.</b> Guinier plots of the SAXS profiles of <b>P2</b> in octane or THF                                   | S9  |
| <b>Figure S3.</b> Transesterification of model ester compounds with benzyl alcohol                                   | S10 |
| <b>Figure S4.</b> Transesterification of PMA and PMMA with benzyl alcohol                                            | S11 |
| <b>Figure S5.</b> Transesterification of <b>P6</b> with various catalysts in octane                                  | S12 |
| <b>Figure S6.</b> Transesterification of <b>P6</b> with Ti(O <i>i</i> -Pr) <sub>4</sub> in octane                    | S13 |
| <b>Figure S7.</b> Transesterification of <b>P9</b> , <b>P10</b> , and <b>P11</b> with Sc(OTf) <sub>3</sub> in octane | S14 |
| <b>Figure S8.</b> Effects of solvent and concentration on transesterification of <b>P2</b>                           | S15 |
| <b>Figure S9.</b> Transesterification of <b>P1</b> – <b>P4</b> with Sc(OTf) <sub>3</sub> in octane                   | S16 |
| <b>Figure S10.</b> Guinier plots of the SANS profiles of <b>P3</b> , <b>P5</b> , and crosslinked products            | S17 |
| <b>Figure S11.</b> Synthesis of crosslinked <b>P2</b> with different crosslinking density                            | S18 |
| <b>Table S2.</b> Characterization of crosslinked <b>P2</b> with different crosslinking density                       | S19 |
| <b>Figure S12.</b> DSC measurements of <b>P1</b> – <b>P4</b> and crosslinked products                                | S19 |

## Experimental Section

### Materials.

Methyl methacrylate (MMA, TCI, purity >99.8%), methyl acrylate (MA, TCI, purity >99%), and tetralin (1,2,3,4-tetrahydronaphthalene, TCI, purity >98%, an internal standard for <sup>1</sup>H NMR analysis) were dried overnight with calcium chloride and distilled from calcium hydride under reduced pressure before use. Octadecyl methacrylate (ODMA, TCI, purity >95%), dodecyl methacrylate (DMA, TCI, purity >97%) and 2-hydroxyethyl methacrylate (HEMA, TCI, purity >95%) were purified by column chromatography with inhibitor remover (Aldrich) and degassed by triple vacuum-argon purge cycles before use. Ethyl  $\alpha$ -bromophenylacetate (EBPA, Wako, purity >94%), tributylamine (*n*-Bu<sub>3</sub>N, TCI, purity >98%), and 1,4-dioxane (Wako, purity >99.5%) were degassed by triple vacuum-argon purge cycles before use. RuCp\*Cl(PPh<sub>3</sub>)<sub>2</sub> (Aldrich, purity >97%), Sc(OTf)<sub>3</sub> (TCI, purity >98%), Hf(OTf)<sub>4</sub> (TCI, purity >90%), La(OTf)<sub>3</sub> (TCI, purity >98%), Y(OTf)<sub>3</sub> (Aldrich, purity >99.9%), and FeCl<sub>3</sub> (Aldrich, purity >97%) were used as received and handled in a glove box under moisture- and oxygen-free argon (H<sub>2</sub>O <1 ppm; O<sub>2</sub> <1 ppm). Ti(O*i*-Pr)<sub>4</sub> (Aldrich, purity >97%) was degassed by triple vacuum-argon purge cycles before use. Toluene (solvent) was purified before use by passing it through a purification column (Glass Contour Solvent System, Nikko Hansen & Co., Ltd.). Octane (Wako, purity >98%), anisole (Wako, purity >99%), benzyl alcohol (Wako, purity >99%), methyl isobutyrate (MI, TCI, purity >99%) and methyl pivalate (MPi, TCI, purity >98%) were used as received.

### Characterization.

Molecular weight distribution (MWD) curves, number-average molecular weight ( $M_n$ ), and  $M_w/M_n$  ratio of the polymers were measured by size exclusion chromatography (SEC, Shodex GPC-104) in THF at 40 °C (flow rate: 0.3 mL/min). In the SEC system, three linear-type polystyrene gel columns (Shodex LF-404: exclusion limit =  $2 \times 10^6$ ; particle size = 6  $\mu$ m; pore size = 3000 Å; 0.46 cm i.d.  $\times$  25 cm) were connected to a DU-2000 pump, a RI-74 refractive index detector, and a UV-41 ultraviolet detector set at 250 nm (all from Shodex). The columns were calibrated against 16 standard poly(MMA) samples (Polymer Laboratories:  $M_p$  = 625–1250000;  $M_w/M_n$  = 1.02–1.30). To remove the residues of catalysts and unreacted monomers, polymer samples were purified before characterization by precipitation into methanol or preparative SEC in CHCl<sub>3</sub> at 25 °C (flow rate: 10 mL/min) on Shodex K-5003 (exclusion limit =  $7 \times 10^4$ , particle size = 15  $\mu$ m, 5 cm i.d.  $\times$  30 cm). <sup>1</sup>H NMR spectra were recorded in CDCl<sub>3</sub> or CD<sub>2</sub>Cl<sub>2</sub> at 25 °C on a JEOL JNM-ECA500 spectrometer operating at 500.16 MHz.

Absolute weight-average molecular weight ( $M_w$ ) of the polymers in THF was determined by

multiangle laser light scattering (MALLS) equipped with SEC on a Dawn HELEOS II instrument (Wyatt Technology, semiconductor laser,  $\lambda = 663$  nm). The SEC system was performed in THF at 40 °C (flow rate: 1 mL/min) on three linear-type polystyrene gel columns (Shodex KF-805L) that were connected to a Jasco PU-2080 precision pump, a Jasco RI-1530 refractive index detector, and a Jasco UV-1570 UV/vis detector set at 270 nm. Intrinsic viscosity measurement of the polymers in THF was performed on a Viscotek TDAmix SEC system (Malvern) equipped with two linear-type polystyrene gel columns (Shodex KF-805L). Dynamic light scattering (DLS) was measured on Otsuka Photol ELSZ-0 equipped with a semi-conductor laser ( $\lambda = 658$  nm) at 25 °C. The measuring angle was 165°.

Differential scanning calorimetry (DSC) was performed for polymer samples (ca. 1-3 mg in an aluminum pan) under dry nitrogen flow on a DSCQ200 calorimeter (TA Instruments) equipped with a RCS 90 electric freezing machine. The heating and cooling rates were performed at 10 °C/min and -10 °C/min, respectively, between -80 °C and 150 °C. The first cooling or second heating scans were employed as data in this work.

Powder X-ray diffraction (PXRD) was performed on a Rigaku SmartLab diffractometer, using a Cu anode and a  $K_{\alpha}$  monochromator ( $\lambda = 0.154$  nm). Small angle X-ray scattering (SAXS) measurements were performed at RIKEN beamline BL45XU of SPring-8, Japan. The X-ray wavelength, sample to detector distance, and the detector used at BL45XU were 0.1 nm, 2500 nm, and PILATUS 3X 2M, respectively. The obtained 2-dimensional data were circularly averaged and corrected for background of cell and electronic noise of detector.

Small angle neutron scattering (SANS) measurements were performed on a BL15 TAIKAN in the Material and Life Science Experimental Facility (MLF) of the Japan Proton Accelerator Research Complex (J-PARC, Tokai, Japan). We utilized the data from the small-angle detector bank. Temperature was controlled with a circulating bath (Ministat 125, Huber Co.). The sample solutions were contained in quartz cells (Starna Scientific Co.) with a 1 mm path length and low neutron absorption ability. The exposure time was around ~0.5 h. For data corrections, air, the empty cell, and THF- $d_8$  filled in the cell were measured. All SANS data were normalized to an absolute intensity by the scattering of a glassy carbon standard after data corrections such as air and cell scattering. The scattering intensities from the cell and the solvent were subtracted with the measured transmission and the volume fraction of the solvent.

## Polymer Synthesis.

The synthesis of **P1** – **P11** was carried out by syringe technique under argon in glass tubes equipped with a three-way stopcock.

**P1** (ODMA/HEMA/MA copolymer): Into a 30 mL glass tube, RuCp\*Cl(PPh<sub>3</sub>)<sub>2</sub> (0.0080 mmol, 6.4 mg) was weighed, and toluene (0.54 mL), 1,4-dioxane (1.03 mL), tetralin (0.10 mL), a 400 mM toluene solution of *n*-Bu<sub>3</sub>N (0.20 mL, *n*-Bu<sub>3</sub>N = 0.080 mmol), ODMA (16 mmol, 6.27 mL), HEMA (4.4 mmol, 0.53 mL), MA (11.6 mmol, 1.04 mL), and a 280 mM toluene solution of EBPA (0.29 mL, EBPA = 0.080 mmol) were added sequentially in that order at 25 °C under argon (the total volume: 10 mL). The glass tube was immersed in an oil bath kept at 80 °C for 24 h and then cooled to –78 °C to terminate the reaction. The monomer conversion was determined by <sup>1</sup>H NMR measurement of the terminated reaction solution in CDCl<sub>3</sub> at 25 °C with tetralin as an internal standard: ODMA/HEMA/MA = 71%/83%/44%. The reaction solution was evaporated to dryness to give the crude polymer. To remove catalyst residues and unreacted monomers, the product was purified by precipitation into methanol to give **P1**. SEC (THF, PMMA std.): *M*<sub>n</sub> = 64200; *M*<sub>w</sub>/*M*<sub>n</sub> = 1.14. <sup>1</sup>H NMR [500 MHz, CD<sub>2</sub>Cl<sub>2</sub>, 25 °C, δ = 5.32 (CDHCl<sub>2</sub>)]: δ 7.3-7.2 (aromatic protons), 4.2-4.0, (-COOCH<sub>2</sub>CH<sub>2</sub>OH), 4.0-3.8 (-COOCH<sub>2</sub>(CH<sub>2</sub>)<sub>16</sub>CH<sub>3</sub>), 3.8-3.7 (-COOCH<sub>2</sub>CH<sub>2</sub>OH), 3.7–3.5 (-OCH<sub>3</sub>), 2.5–1.2 (-CH<sub>2</sub>CH(COO)-, -CH<sub>2</sub>CH(COO)-, -CH<sub>2</sub>C(CH<sub>3</sub>)-), 1.7–1.6 (-COOCH<sub>2</sub>CH<sub>2</sub>(CH<sub>2</sub>)<sub>15</sub>CH<sub>3</sub>), 1.4–1.2 (-COOCH<sub>2</sub>CH<sub>2</sub>(CH<sub>2</sub>)<sub>15</sub>CH<sub>3</sub>), 1.2–0.8 (-CH<sub>2</sub>C(CH<sub>3</sub>)-), 0.9–0.8 (-COOCH<sub>2</sub>(CH<sub>2</sub>)<sub>16</sub>CH<sub>3</sub>). *dn/dc* = 0.080 (THF). **P2** – **P5** were similarly prepared.

**P6** (DMA/HEMA/MA copolymer): Into a 30 mL glass tube, RuCp\*Cl(PPh<sub>3</sub>)<sub>2</sub> (0.020 mmol, 15.9 mg) was weighed, and toluene (2.67 mL), 1,4-dioxane (4.03 mL), tetralin (0.20 mL), a 400 mM toluene solution of *n*-Bu<sub>3</sub>N (0.50 mL, *n*-Bu<sub>3</sub>N = 0.20 mmol), DMA (30 mmol, 8.79 mL), HEMA (7.5 mmol, 0.91 mL), MA (22.5 mmol, 2.03 mL), and a 230 mM toluene solution of EBPA (0.87 mL, EBPA = 0.20 mmol) were added sequentially in that order at 25 °C under argon (the total volume: 20 mL). The glass tube was immersed in an oil bath kept at 80 °C for 60 h and then cooled to –78 °C to terminate the reaction. The monomer conversion was determined by <sup>1</sup>H NMR measurement of the terminated reaction solution in CDCl<sub>3</sub> at r.t. with tetralin as an internal standard: DMA/HEMA/MA = 64%/77%/38%. The reaction solution was evaporated to dryness to give the crude polymer. The product was precipitated into methanol to give **P6**. SEC (THF, PMMA std.): *M*<sub>n</sub> = 43600; *M*<sub>w</sub>/*M*<sub>n</sub> = 1.16. <sup>1</sup>H NMR [500 MHz, CD<sub>2</sub>Cl<sub>2</sub>, 25 °C, δ = 5.32 (CDHCl<sub>2</sub>)]: δ 7.3-7.2 (aromatic protons), 4.2-4.0, (-COOCH<sub>2</sub>CH<sub>2</sub>OH), 4.0-3.8 (-COOCH<sub>2</sub>(CH<sub>2</sub>)<sub>10</sub>CH<sub>3</sub>), 3.8 (-COOCH<sub>2</sub>CH<sub>2</sub>OH), 3.7–3.5 (-OCH<sub>3</sub>), 2.5–1.2 (-CH<sub>2</sub>CH(COO)-, -CH<sub>2</sub>CH(COO)-, -CH<sub>2</sub>C(CH<sub>3</sub>)-), 1.7–1.6 (-COOCH<sub>2</sub>CH<sub>2</sub>(CH<sub>2</sub>)<sub>9</sub>CH<sub>3</sub>), 1.4–1.2 (-COOCH<sub>2</sub>CH<sub>2</sub>(CH<sub>2</sub>)<sub>9</sub>CH<sub>3</sub>), 1.2–0.8 (-CH<sub>2</sub>C(CH<sub>3</sub>)-), 0.9–0.8 (-COOCH<sub>2</sub>(CH<sub>2</sub>)<sub>10</sub>CH<sub>3</sub>). *dn/dc* = 0.081 (THF).

**P7** (MMA/HEMA/MA copolymer): Into a 30 mL glass tube, RuCp\*Cl(PPh<sub>3</sub>)<sub>2</sub> (0.012 mmol, 9.6 mg) was weighed, and toluene (0.38 mL), 1,4-dioxane (1.12 mL), tetralin (0.060 mL), a 400 mM toluene solution of *n*-Bu<sub>3</sub>N (0.30 mL, *n*-Bu<sub>3</sub>N = 0.12 mmol), MMA (19.2 mmol, 2.05 mL), HEMA (4.8 mmol, 0.58 mL), MA (12 mmol, 1.08 mL), and a 280 mM toluene solution of EBPA (0.43 mL, EBPA = 0.12 mmol) were added sequentially in that order at 25 °C under argon (the total volume: 6 mL). The glass tube was immersed in an oil bath kept at 80 °C for 48 h and then cooled to -78 °C to terminate the reaction. The monomer conversion was determined by <sup>1</sup>H NMR measurement of the terminated reaction solution in CDCl<sub>3</sub> at r.t. with tetralin as an internal standard: MMA/HEMA/MA = 74%/83%/47%. The reaction solution was evaporated to dryness to give the crude polymer. The product was fractionated by preparative SEC to give **P7**. SEC (THF, PMMA std.): *M<sub>n</sub>* = 28800; *M<sub>w</sub>*/*M<sub>n</sub>* = 1.19. <sup>1</sup>H NMR [500 MHz, CD<sub>2</sub>Cl<sub>2</sub>, 25 °C, δ = 5.32 (CDHCl<sub>2</sub>)]: δ 7.3-7.2 (aromatic protons), 4.2-4.0, (-COOCH<sub>2</sub>CH<sub>2</sub>OH), 3.8 (-COOCH<sub>2</sub>CH<sub>2</sub>OH), 3.7-3.5 (-OCH<sub>3</sub>), 2.5-1.2 (-CH<sub>2</sub>CH(COO)-, -CH<sub>2</sub>CH(COO)-, -CH<sub>2</sub>C(CH<sub>3</sub>)-), 1.2-0.8 (-CH<sub>2</sub>C(CH<sub>3</sub>)-). *dn/dc* = 0.085 (THF).

**P8** (HEMA/MA copolymer): Into a 30 mL glass tube, RuCp\*Cl(PPh<sub>3</sub>)<sub>2</sub> (0.010 mmol, 8.0 mg) was weighed, and 1,4-dioxane (0.60 mL), tetralin (0.010 mL), a 400 mM toluene solution of *n*-Bu<sub>3</sub>N (0.25 mL, *n*-Bu<sub>3</sub>N = 0.10 mmol), HEMA (3.0 mmol, 0.36 mL), MA (27 mmol, 2.43 mL), and a 284 mM toluene solution of EBPA (0.35 mL, EBPA = 0.10 mmol) were added sequentially in that order at 25 °C under argon (the total volume: 4 mL). The glass tube was immersed in an oil bath kept at 80 °C for 48 h and then cooled to -78 °C to terminate the reaction. The monomer conversion was determined by <sup>1</sup>H NMR measurement of the terminated reaction solution in CDCl<sub>3</sub> at r.t. with tetralin as an internal standard: HEMA/MA = 78%/40%. The reaction solution was evaporated to dryness to give the crude polymer. The product was fractionated by preparative SEC to give **P8**. SEC (THF, PMMA std.): *M<sub>n</sub>* = 17000; *M<sub>w</sub>*/*M<sub>n</sub>* = 1.11. <sup>1</sup>H NMR [500 MHz, CD<sub>2</sub>Cl<sub>2</sub>, 25 °C, δ = 5.32 (CDHCl<sub>2</sub>)]: δ 7.3-7.2 (aromatic protons), 4.2-4.0, (-COOCH<sub>2</sub>CH<sub>2</sub>OH), 3.8-3.7 (-COOCH<sub>2</sub>CH<sub>2</sub>OH), 3.7-3.5 (-OCH<sub>3</sub>), 2.5-1.2 (-CH<sub>2</sub>CH(COO)-, -CH<sub>2</sub>CH(COO)-, -CH<sub>2</sub>C(CH<sub>3</sub>)-), 1.2-0.8 (-CH<sub>2</sub>C(CH<sub>3</sub>)-). *dn/dc* = 0.079 (THF).

**P9** (ODMA/MA copolymer): Into a 30 mL glass tube, RuCp\*Cl(PPh<sub>3</sub>)<sub>2</sub> (0.0018 mmol, 1.43 mg) was weighed, and toluene (0.30 mL), tetralin (0.020 mL), a 400 mM toluene solution of *n*-Bu<sub>3</sub>N (0.050 mL, *n*-Bu<sub>3</sub>N = 0.018 mmol), ODMA (3.6 mmol, 1.41 mL), MA (1.8 mmol, 0.16 mL), and a 284 mM toluene solution of EBPA (0.060 mL, EBPA = 0.018 mmol) were added sequentially in that order at 25 °C under argon (the total volume: 2 mL). The glass tube was immersed in an oil bath kept at 80 °C for 22 h and then cooled to -78 °C to terminate the reaction. The monomer conversion was determined by <sup>1</sup>H NMR measurement of the terminated reaction solution in CDCl<sub>3</sub> at r.t. with tetralin as an internal standard: ODMA/MA = 73%/44%. The reaction solution was

evaporated to dryness to give the crude polymer. The product was fractionated by preparative SEC to give **P9**. SEC (THF, PMMA std.):  $M_n = 49700$ ;  $M_w/M_n = 1.11$ .  $^1\text{H NMR}$  [500 MHz,  $\text{CD}_2\text{Cl}_2$ , 25 °C,  $\delta = 5.32$  ( $\text{CDHCl}_2$ )]:  $\delta$  7.3-7.2 (aromatic protons), 4.1-3.8 ( $-\text{COOCH}_2(\text{CH}_2)_{16}\text{CH}_3$ ), 3.7-3.5 ( $-\text{OCH}_3$ ), 2.4-1.2 ( $-\text{CH}_2\text{CH}(\text{COO})-$ ),  $-\text{CH}_2\text{CH}(\text{COO})-$ ,  $-\text{CH}_2\text{C}(\text{CH}_3)-$ , 1.7-1.6 ( $-\text{COOCH}_2\text{CH}_2(\text{CH}_2)_{15}\text{CH}_3$ ), 1.4-1.2 ( $-\text{COOCH}_2\text{CH}_2(\text{CH}_2)_{15}\text{CH}_3$ ), 1.2-0.8 ( $-\text{CH}_2\text{C}(\text{CH}_3)-$ ), 0.9-0.8 ( $-\text{COOCH}_2(\text{CH}_2)_{16}\text{CH}_3$ ).

**P10** (ODMA/HEMA copolymer): Into a 30 mL glass tube,  $\text{RuCp}^*\text{Cl}(\text{PPh}_3)_2$  (0.0188 mmol, 14.9 mg) was weighed, and toluene (1.74 mL), 1,4-dioxane (2.88 mL), tetralin (0.25 mL), a 400 mM toluene solution of *n*- $\text{Bu}_3\text{N}$  (0.47 mL, *n*- $\text{Bu}_3\text{N} = 0.188$  mmol), ODMA (45 mmol, 17.6 mL), HEMA (11.3 mmol, 1.36 mL), and a 280 mM toluene solution of EBPA (0.67 mL, EBPA = 0.188 mmol) were added sequentially in that order at 25 °C under argon (the total volume: 25 mL). The glass tube was immersed in an oil bath kept at 80 °C for 26 h and then cooled to -78 °C to terminate the reaction. The monomer conversion was determined by  $^1\text{H NMR}$  measurement of the terminated reaction solution in  $\text{CDCl}_3$  at r.t. with tetralin as an internal standard: ODMA/HEMA = 24%/41%. The reaction solution was evaporated to dryness to give the crude polymer. The product was precipitated into methanol to give **P10**. SEC (THF, PMMA std.):  $M_n = 30600$ ;  $M_w/M_n = 1.18$ .  $^1\text{H NMR}$  [500 MHz,  $\text{CD}_2\text{Cl}_2$ , 25 °C,  $\delta = 5.32$  ( $\text{CDHCl}_2$ )]:  $\delta$  7.3-7.2 (aromatic protons), 4.2-4.0, ( $-\text{COOCH}_2\text{CH}_2\text{OH}$ ), 4.0-3.8 ( $-\text{COOCH}_2(\text{CH}_2)_{16}\text{CH}_3$ ), 3.8-3.7 ( $-\text{COOCH}_2\text{CH}_2\text{OH}$ ), 2.2-1.6 ( $-\text{CH}_2\text{C}(\text{CH}_3)-$ ), 1.7-1.6 ( $-\text{COOCH}_2\text{CH}_2(\text{CH}_2)_{15}\text{CH}_3$ ), 1.4-1.2 ( $-\text{COOCH}_2\text{CH}_2(\text{CH}_2)_{15}\text{CH}_3$ ), 1.2-0.8 ( $-\text{CH}_2\text{C}(\text{CH}_3)-$ ), 0.9-0.8 ( $-\text{COOCH}_2(\text{CH}_2)_{16}\text{CH}_3$ ).

**P11** (ODMA/HEMA/MMA copolymer): Into a 30 mL glass tube,  $\text{RuCp}^*\text{Cl}(\text{PPh}_3)_2$  (0.0018 mmol, 1.43 mg) was weighed, and toluene (0.11 mL), 1,4-dioxane (0.22 mL), tetralin (0.020 mL), a 400 mM toluene solution of *n*- $\text{Bu}_3\text{N}$  (0.050 mL, *n*- $\text{Bu}_3\text{N} = 0.018$  mmol), ODMA (3.35 mmol, 1.31 mL), HEMA (8.5 mmol, 0.10 mL), MMA (1.2 mmol, 0.13 mL), and a 284 mM toluene solution of EBPA (0.060 mL, EBPA = 0.018 mmol) were added sequentially in that order at 25 °C under argon (the total volume: 2 mL). The glass tube was immersed in an oil bath kept at 80 °C for 48 h and then cooled to -78 °C to terminate the reaction. The monomer conversion was determined by  $^1\text{H NMR}$  measurement of the terminated reaction solution in  $\text{CDCl}_3$  at r.t. with tetralin as an internal standard: ODMA/HEMA/MMA = 37%/55%/45%. The reaction solution was evaporated to dryness to give the crude polymer. The product was fractionated by preparative SEC to give **P11**. SEC (THF, PMMA std.):  $M_n = 38800$ ;  $M_w/M_n = 1.10$ .  $^1\text{H NMR}$  [500 MHz,  $\text{CD}_2\text{Cl}_2$ , 25 °C,  $\delta = 5.32$  ( $\text{CDHCl}_2$ )]:  $\delta$  7.3-7.2 (aromatic protons), 4.2-4.0, ( $-\text{COOCH}_2\text{CH}_2\text{OH}$ ), 4.0-3.8 ( $-\text{COOCH}_2(\text{CH}_2)_{16}\text{CH}_3$ ), 3.8 ( $-\text{COOCH}_2\text{CH}_2\text{OH}$ ), 3.6-3.5 ( $-\text{OCH}_3$ ), 2.2-1.6 ( $-\text{CH}_2\text{C}(\text{CH}_3)-$ ), 1.7-1.6 ( $-\text{COOCH}_2\text{CH}_2(\text{CH}_2)_{15}\text{CH}_3$ ), 1.4-1.2 ( $-\text{COOCH}_2\text{CH}_2(\text{CH}_2)_{15}\text{CH}_3$ ), 1.2-0.8 ( $-\text{CH}_2\text{C}(\text{CH}_3)-$ ), 0.9-0.8 ( $-\text{COOCH}_2(\text{CH}_2)_{16}\text{CH}_3$ ).

## Transesterification.

Transesterification was carried out by syringe technique under argon in glass tubes equipped with a three-way stopcock.

**Transesterification of Methyl Isobutyrate and Methyl Pivalate.** A typical procedure for the transesterification of methyl isobutyrate was given: Into a 30 mL glass tube, Sc(OTf)<sub>3</sub> (0.020 mmol, 9.8 mg) was weighed, and toluene (0.76 mL), benzyl alcohol (0.76 mL), tetralin (0.02 mL), and methyl isobutyrate (4.0 mmol, 0.46 mL) were added sequentially in that order at 25 °C under argon (the total volume: 2 mL). The glass tube was immersed in an oil bath kept at 80 °C. The solution was sampled at predetermined intervals. The sampled solutions were cooled to -78 °C to terminate the reaction. The conversion was determined by <sup>1</sup>H NMR measurement of the terminated solutions in CDCl<sub>3</sub> at r.t. with tetralin as an internal standard (61%, 48 h, Figure S3).

**Synthesis of Single-Chain Polymer Nanoparticles via Transesterification.** A typical procedure for the intramolecular transesterification of **P1** with Sc(OTf)<sub>3</sub> was given: Into a 50 mL round-bottomed flask, a 10 wt% dichloromethane solution of **P1** ( $M_n = 64200$ ,  $M_w/M_n = 1.14$ , 1.0 mL, polymer = 0.0016 mmol, 100 mg) was added and the solution was evaporated to remove the solvent. Into this, Sc(OTf)<sub>3</sub> (0.010 mmol, 4.9 mg) was weighed and octane (10 mL) was added at 25 °C under argon (the total volume: 10 mL). The flask was immersed in an oil bath kept at 120 °C for 48 h and cooled to -78 °C to terminate the reaction. The quenched solution was evaporated to dryness to give the crude product. The product was fractionated by preparative SEC to remove the catalyst residue. SEC (THF, PMMA std.):  $M_n = 39800$ ;  $M_w/M_n = 1.15$ . <sup>1</sup>H NMR [500 MHz, CD<sub>2</sub>Cl<sub>2</sub>, 25 °C,  $\delta = 5.32$  (CDHCl<sub>2</sub>)]:  $\delta$  7.3-7.2 (aromatic protons), 4.2-3.8 (-COOCH<sub>2</sub>(CH<sub>2</sub>)<sub>16</sub>CH<sub>3</sub>), 3.7-3.5 (-OCH<sub>3</sub>), 2.5-1.2 (-CH<sub>2</sub>CH(COO)-, -CH<sub>2</sub>CH(COO)-, -CH<sub>2</sub>C(CH<sub>3</sub>)-), 1.7-1.6 (-COOCH<sub>2</sub>CH<sub>2</sub>(CH<sub>2</sub>)<sub>15</sub>CH<sub>3</sub>), 1.4-1.2 (-COOCH<sub>2</sub>CH<sub>2</sub>(CH<sub>2</sub>)<sub>15</sub>CH<sub>3</sub>), 1.2-0.8 (-CH<sub>2</sub>C(CH<sub>3</sub>)-), 0.9-0.8 (-COOCH<sub>2</sub>(CH<sub>2</sub>)<sub>16</sub>CH<sub>3</sub>).  $dn/dc = 0.080$  (THF).

## Supporting Data

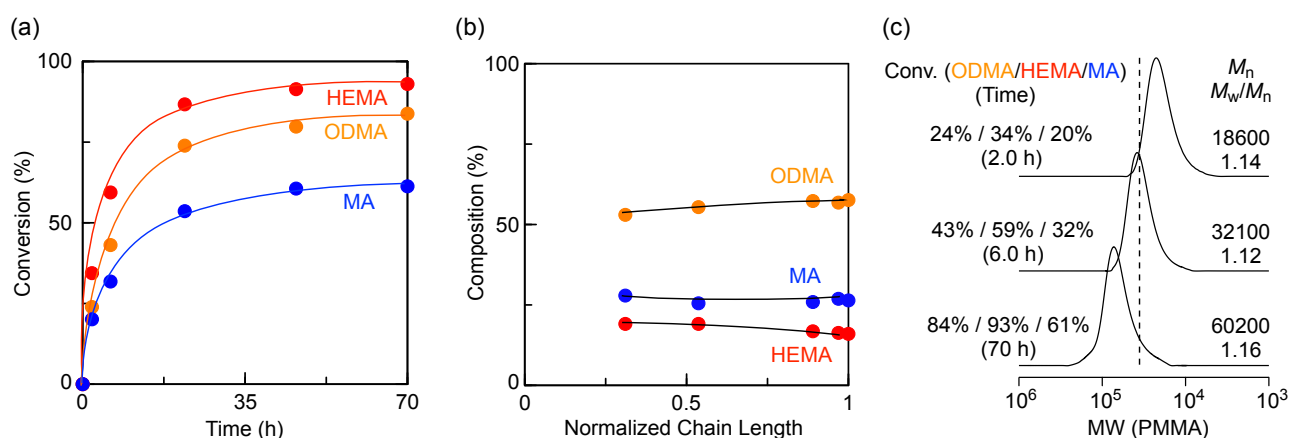

**Figure S1.** Ru-catalyzed living radical copolymerization of ODMA, HEMA, and MA with EBPA for a ODMA/HEMA/MA random copolymer:  $[\text{ODMA}]_0/[\text{HEMA}]_0/[\text{MA}]_0/[\text{EBPA}]_0/[\text{RuCp}^*\text{Cl}(\text{PPh}_3)_2]_0/[\textit{n}\text{-Bu}_3\text{N}]_0 = 1600/400/1000/10/1/10$  mM in toluene/1,4-dioxane (1/1, v/v) at 80 °C. (a) Time-conversion plot, (b) cumulative monomer composition ( $F_{\text{cum}}$ ) of the resulting copolymer as a function of normalized chain length, and (c) SEC curves of the products.

**Table S1.** Synthesis of Control Precursor Polymers<sup>a</sup>

| Entry      | Monomer       | Time (h) | Conv. <sup>b</sup> (%) | $M_n^c$ (SEC) | $M_w/M_n^c$ (SEC) | DP <sup>d</sup> |
|------------|---------------|----------|------------------------|---------------|-------------------|-----------------|
| <b>P9</b>  | ODMA/MA       | 22       | 73/44                  | 49700         | 1.11              | 160/45          |
| <b>P10</b> | ODMA/HEMA     | 26       | 24/41                  | 30600         | 1.18              | 75/30           |
| <b>P11</b> | ODMA/HEMA/MMA | 48       | 37/55/45               | 38800         | 1.10              | 90/35/35        |

<sup>a</sup> Polymer Precursors were synthesized by Ru-catalyzed living radical (co)polymerization. **P9**:  $[\text{ODMA}]_0/[\text{MA}]_0/[\text{EBPA}]_0/[\text{RuCp}^*\text{Cl}(\text{PPh}_3)_2]_0/[\textit{n}\text{-Bu}_3\text{N}]_0 = 1800/900/9/0.9/9$  mM in toluene at 80 °C. **P10**:  $[\text{ODMA}]_0/[\text{HEMA}]_0/[\text{EBPA}]_0/[\text{RuCp}^*\text{Cl}(\text{PPh}_3)_2]_0/[\textit{n}\text{-Bu}_3\text{N}]_0 = 1800/450/7.5/0.75/7.5$  mM in toluene/1,4-dioxane (1/1, v/v) at 80 °C. **P11**:  $[\text{ODMA}]_0/[\text{HEMA}]_0/[\text{MMA}]_0/[\text{EBPA}]_0/[\text{RuCp}^*\text{Cl}(\text{PPh}_3)_2]_0/[\textit{n}\text{-Bu}_3\text{N}]_0 = 1675/425/600/9/0.9/9$  mM in toluene/1,4-dioxane (1/1, v/v) at 80 °C.

<sup>b</sup> Conversion determined by <sup>1</sup>H NMR with tetralin as an internal standard.

<sup>c</sup> Determined by SEC in THF (**P1** – **P6**, **P8** – **P15**) or DMF (**P7**) with PMMA standard calibration.

<sup>d</sup> Degree of polymerization (DP) of the copolymers determined by <sup>1</sup>H NMR.



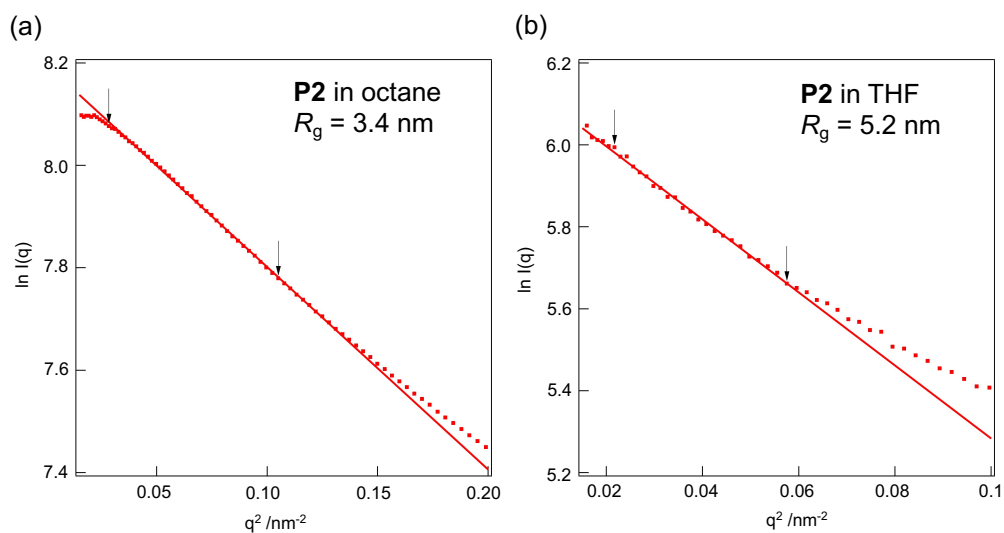

**Figure S2.** Guinier plots obtained from the SAXS profiles of **P2** in (a) octane or (b) THF at 25 °C (see Figure 1b):  $[\mathbf{P2}] = 1 \text{ mg/mL}$ .

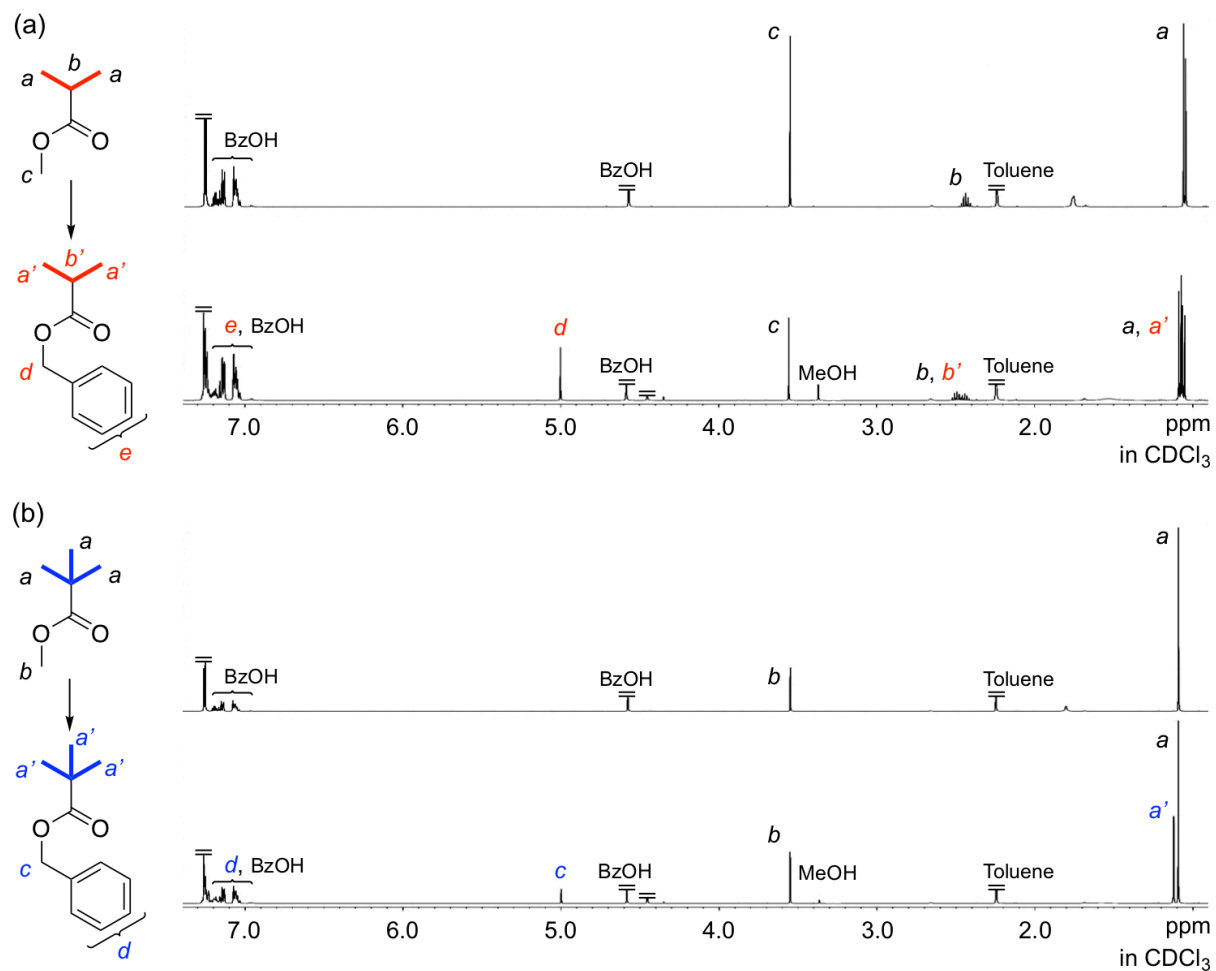

**Figure S3.** <sup>1</sup>H NMR spectra (in CDCl<sub>3</sub> at 25 °C) of the crude products obtained from the transesterification of (a) methyl isobutyrate or (b) methyl pivalate: [substrate]<sub>0</sub>/[Sc(OTf)<sub>3</sub>]<sub>0</sub> = 2000/10 mM in toluene/benzyl alcohol (BzOH) (1/1, v/v) at 80 °C for 48 h ([BzOH]<sub>0</sub> = 3500 – 3700 mM).

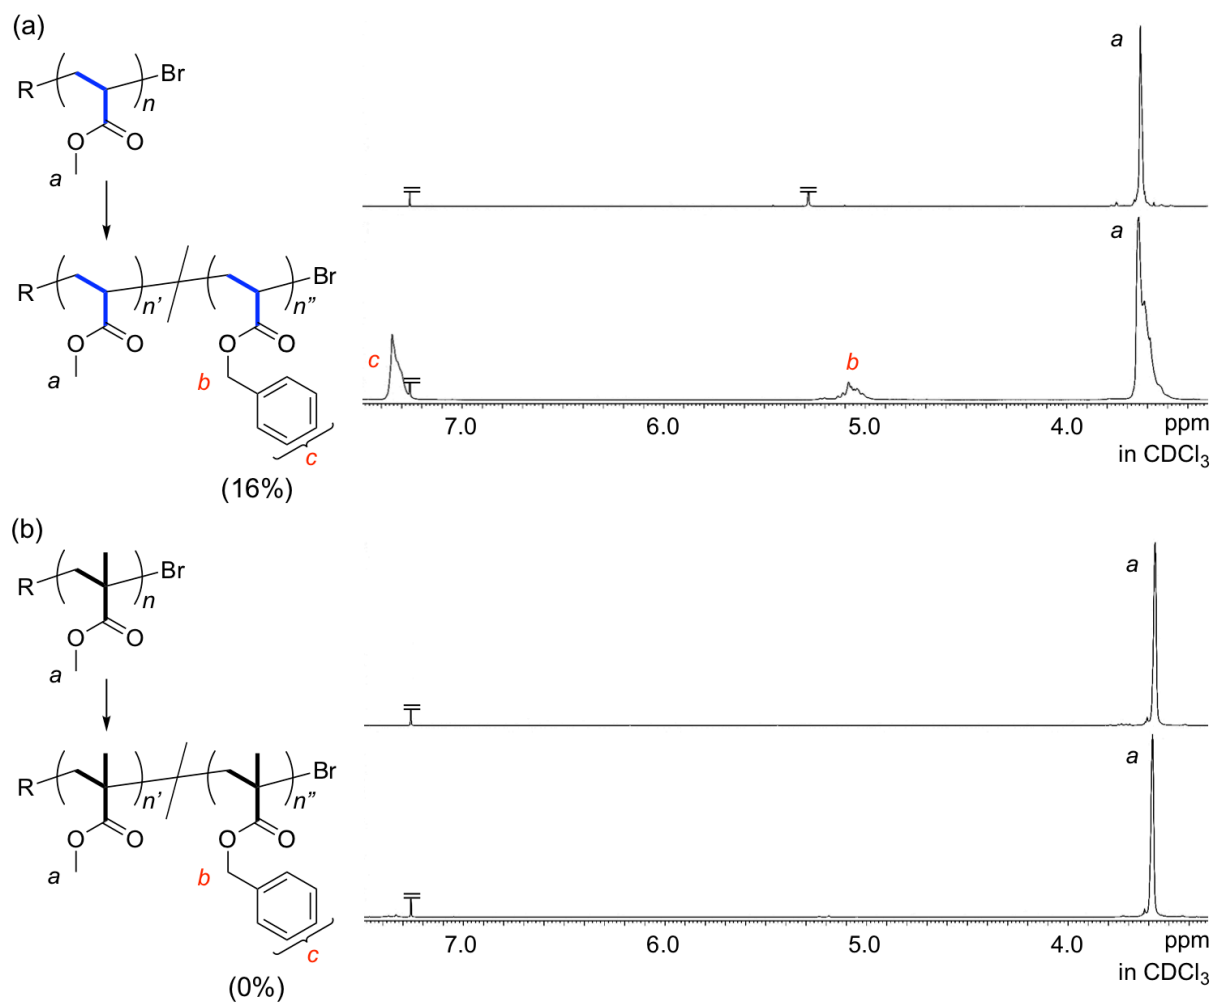

**Figure S4.**  $^1\text{H}$  NMR spectra (in  $\text{CDCl}_3$  at  $25\text{ }^\circ\text{C}$ ) of the purified products obtained from the transesterification of (a) PMA ( $M_n = 6200$ ,  $M_w/M_n = 1.08$ ) or (b) PMMA ( $M_n = 7600$ ,  $M_w/M_n = 1.21$ ):  $[\text{polymer}]_0 / [\text{Sc}(\text{OTf})_3]_0 = 10/2.5\text{ mM}$  with MS 4A ( $0.33\text{ g/mL}$ ) in anisole/benzyl alcohol (BzOH) (1/1, v/v) at  $120\text{ }^\circ\text{C}$  for 48 h ( $[\text{BzOH}]_0 = 4800\text{ mM}$ ).

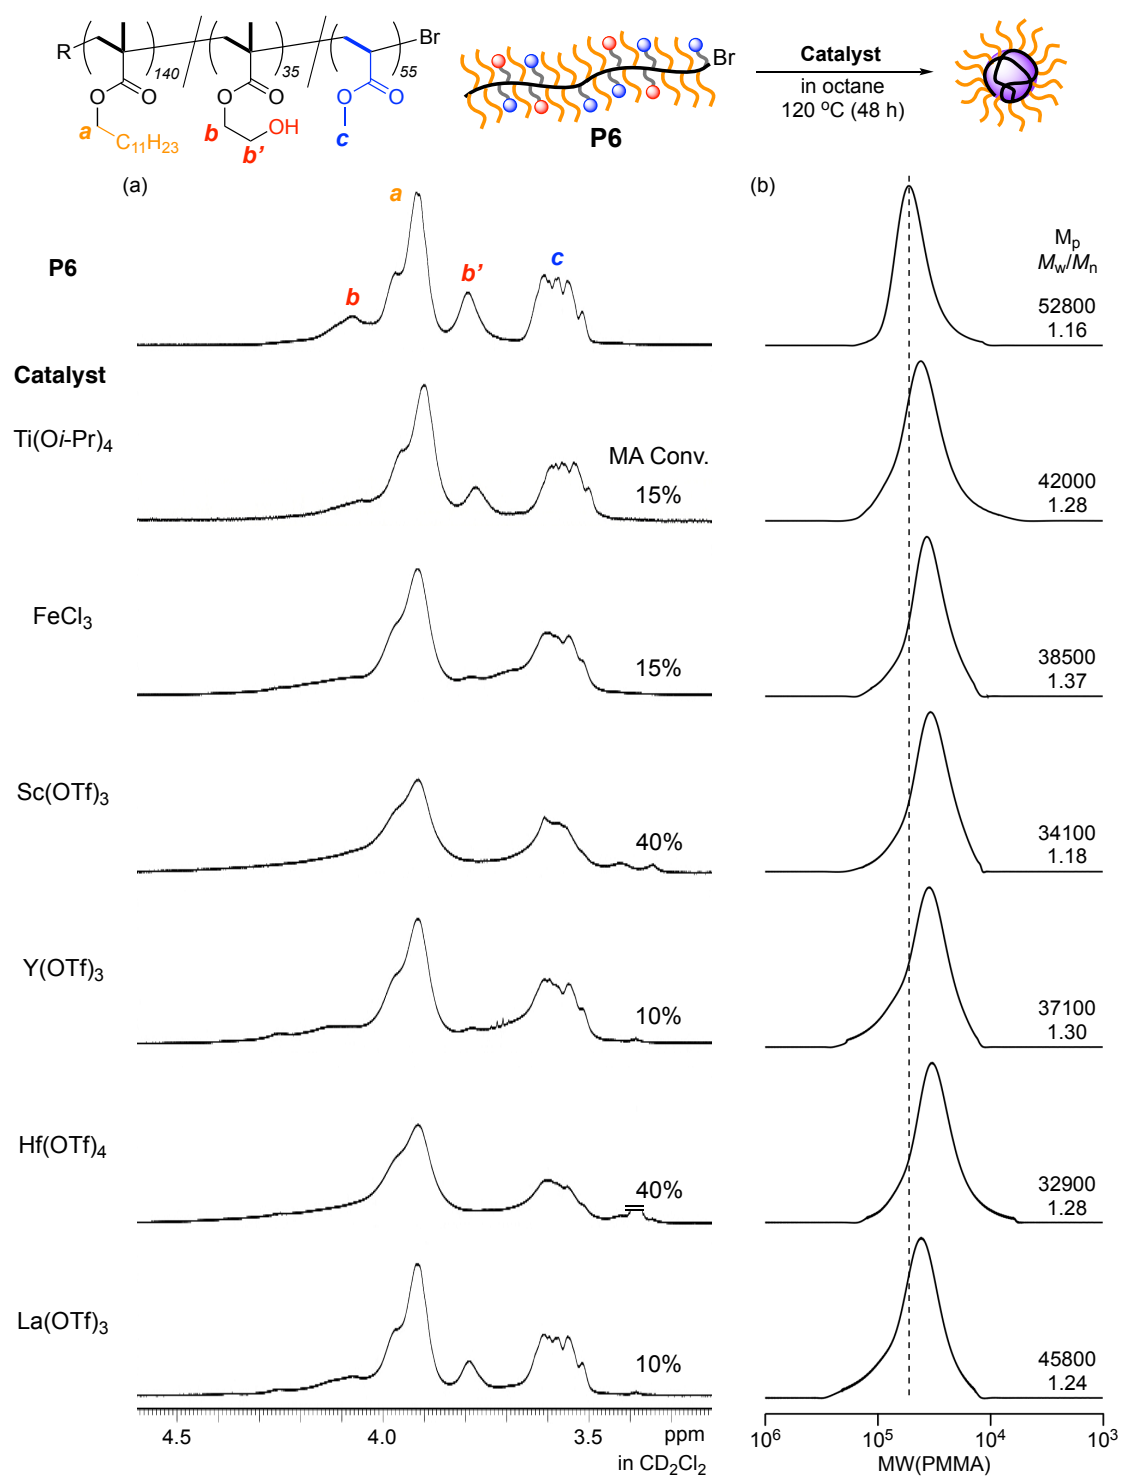

**Figure S5.** (a)  $^1\text{H}$  NMR spectra (in  $\text{CD}_2\text{Cl}_2$  at  $25\text{ }^\circ\text{C}$ ) and (b) SEC curves of the products obtained from the crosslinking of **P6** with various catalysts:  $[\text{P6}]_0 = 0.23\text{ mM}$  ( $10\text{ mg/mL}$ ),  $[\text{catalyst}]_0 = 1.0\text{ mM}$  in octane at  $120\text{ }^\circ\text{C}$  for 48 h.

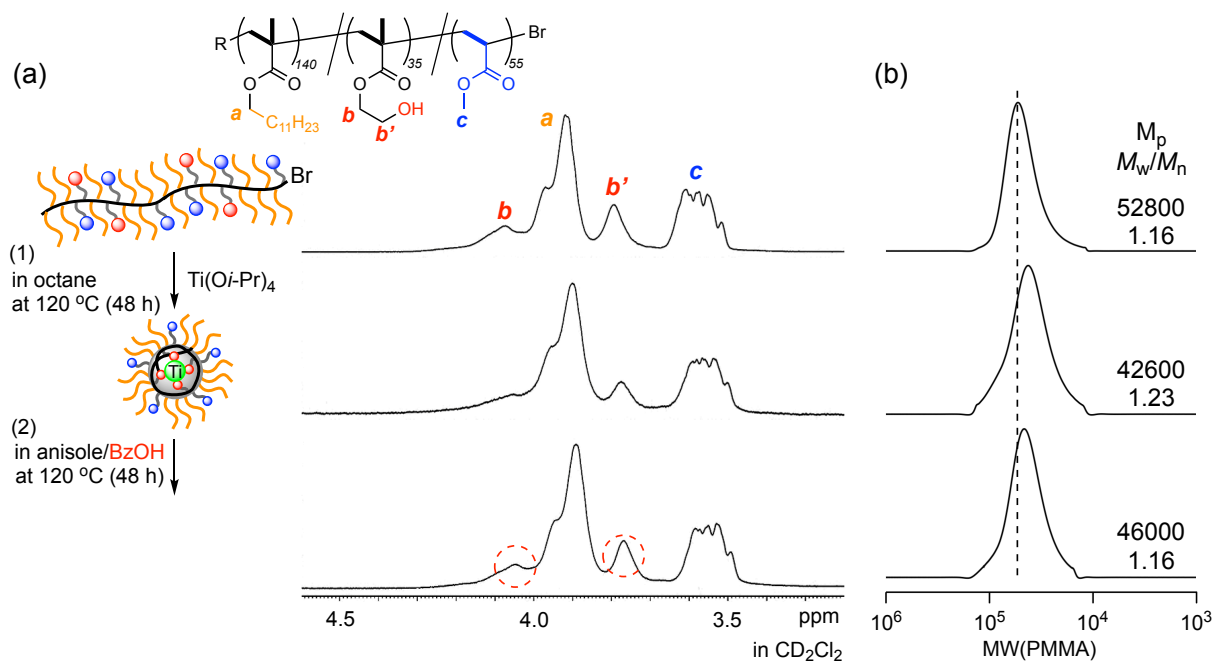

**Figure S6.** (a) <sup>1</sup>H NMR spectra (in CD<sub>2</sub>Cl<sub>2</sub> at 25 °C) and (b) SEC curves of the product obtained from the crosslinking of **P6** with Ti(Oi-Pr)<sub>4</sub> (1) and the reaction of the crosslinked product with BzOH (2). (1) [**P6**]<sub>0</sub> = 0.23 mM (10 mg/mL), [Ti(Oi-Pr)<sub>4</sub>]<sub>0</sub> = 1.0 mM in octane at 120 °C for 48 h. (2) [the crosslinked product]<sub>0</sub> = 10 mg/mL in anisole/BzOH (1/1, v/v) at 120 °C for 48 h.

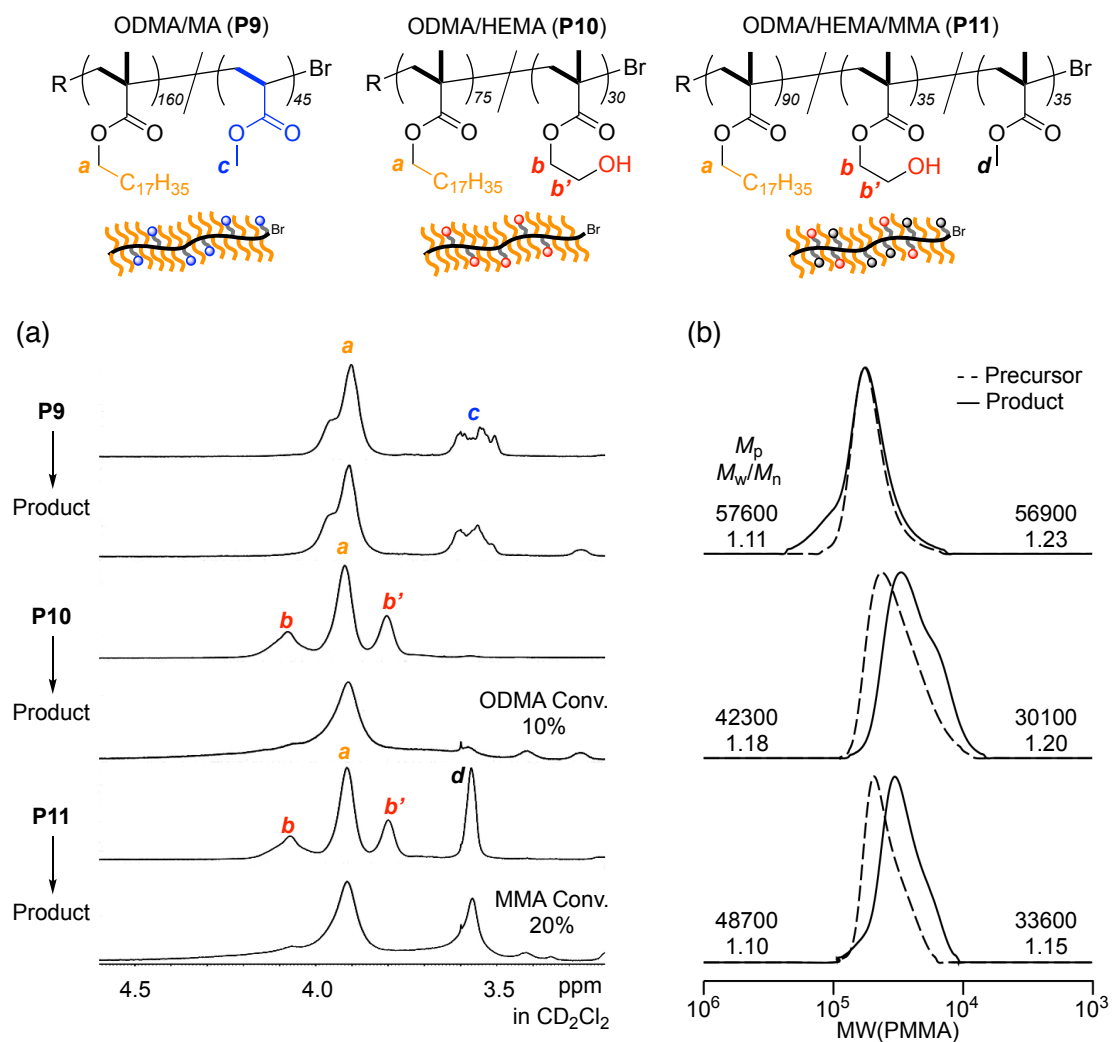

**Figure S7.** (a) <sup>1</sup>H NMR spectra (in CD<sub>2</sub>Cl<sub>2</sub> at 25 °C) and (b) SEC curves of the products obtained from the reaction of ODMA/MA (**P9**), ODMA/HEMA (**P10**), and ODMA/HEMA/MMA (**P11**) copolymers with Sc(OTf)<sub>3</sub>: [polymer]<sub>0</sub> = 10 mg/mL [0.20 (**P9**), 0.33 (**P10**), 0.26 (**P11**) mM] and [Sc(OTf)<sub>3</sub>]<sub>0</sub> = 1.0 mM in octane at 120 °C for 48 h.

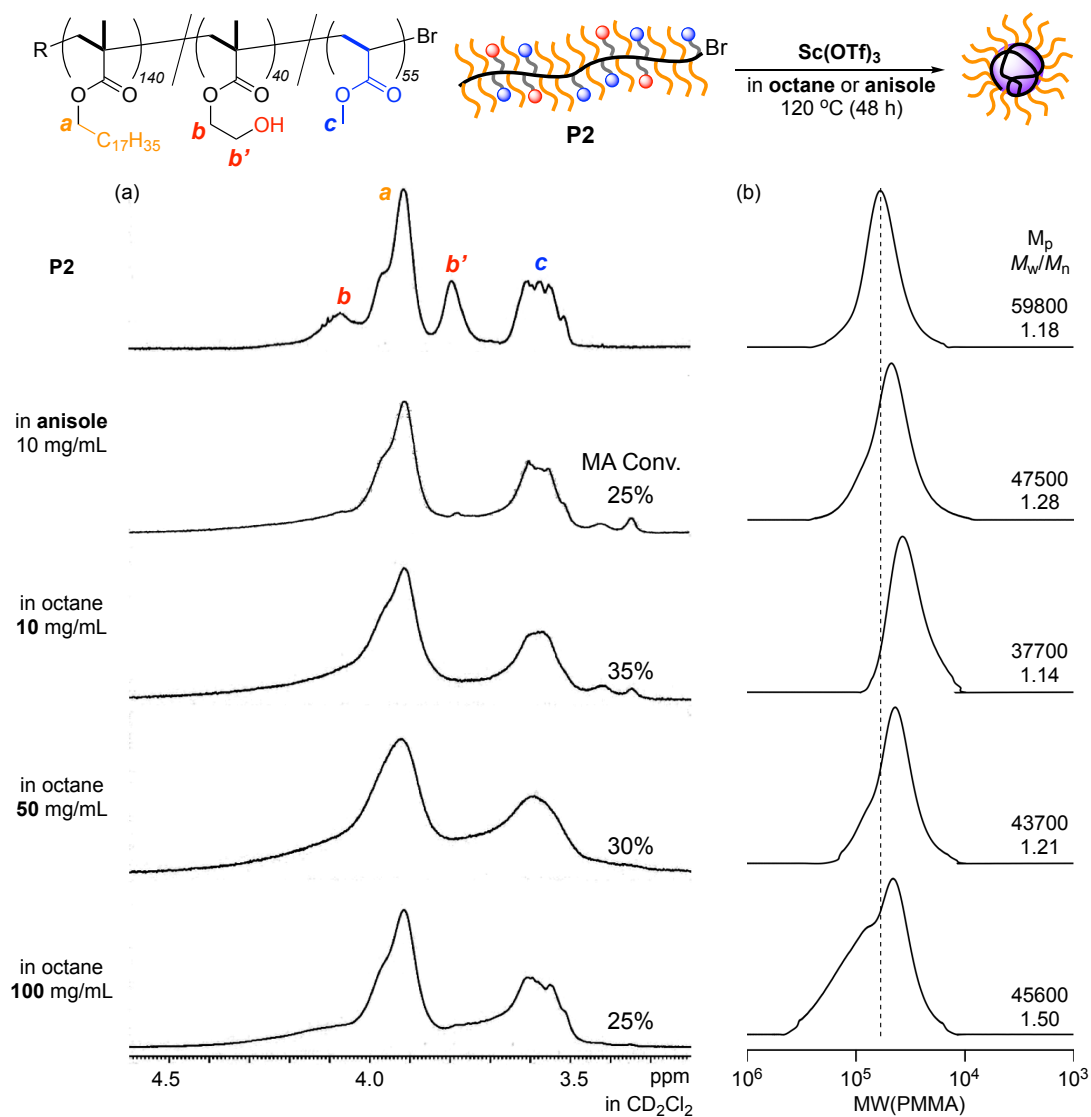

**Figure S8.** (a)  $^1\text{H}$  NMR spectra and (b) SEC curves of the products obtained from the transesterification of **P2** with  $\text{Sc}(\text{OTf})_3$ :  $[\text{P2}]_0 = 0.19 - 1.88$  mM (10 – 100 mg/mL),  $[\text{Sc}(\text{OTf})_3]_0 = 1.0$  mM in octane or anisole at 120 °C for 48 h.

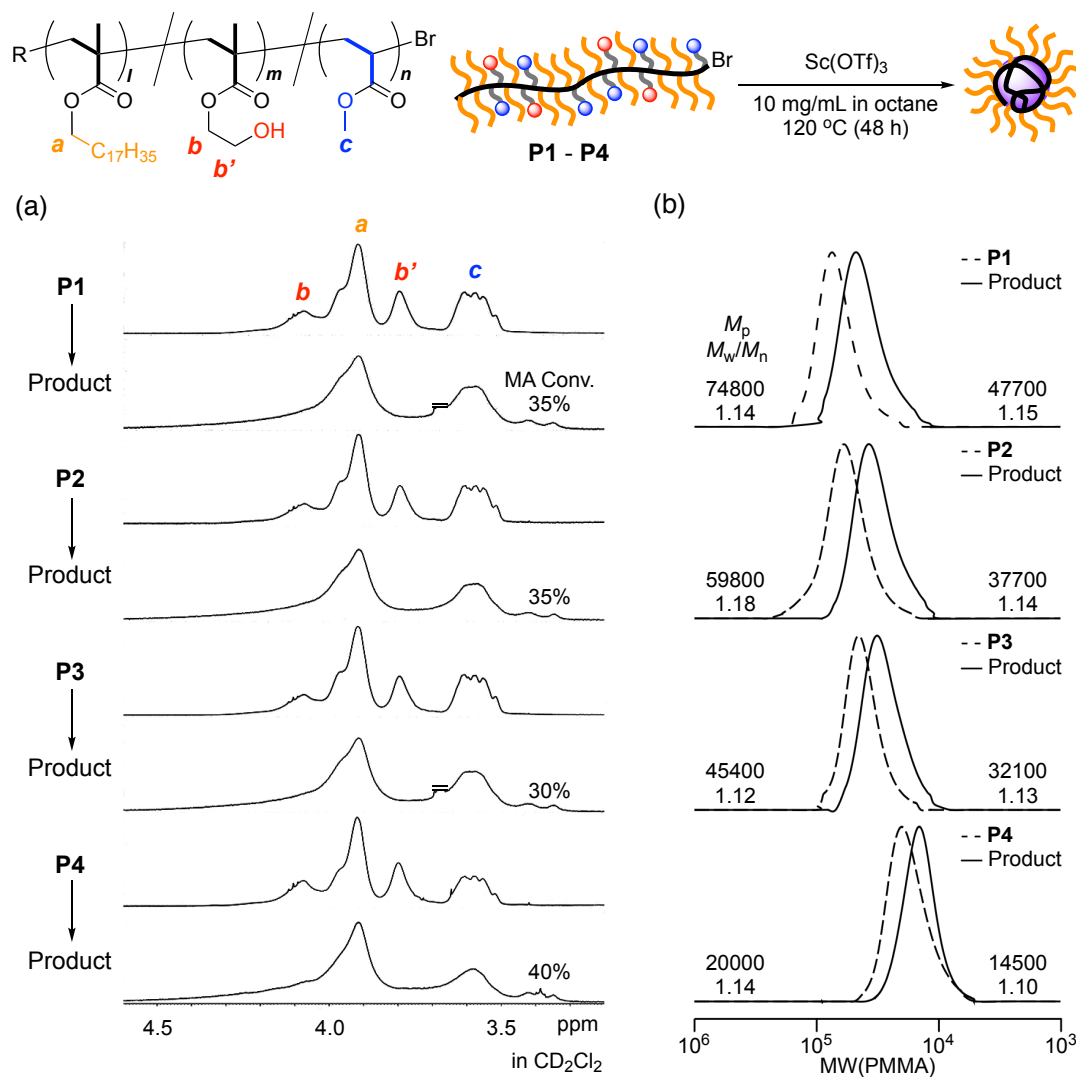

**Figure S9.**  $^1\text{H}$  NMR spectra (a - d) and SEC curves (e - h) of the products obtained from the intramolecular transesterification of ODMA/HEMA/MA copolymers (a, e: **P1**, b, f: **P2**, c, g: **P3**, d, h: **P4**) with  $\text{Sc}(\text{OTf})_3$ :  $[\text{polymer}]_0 = 10 \text{ mg/mL}$  (P1: 0.16, P2: 0.19, P3: 0.25, P4: 0.60 mM),  $[\text{Sc}(\text{OTf})_3]_0 = 1.0 \text{ mM}$  in octane at  $120 \text{ }^\circ\text{C}$  for 48 h.



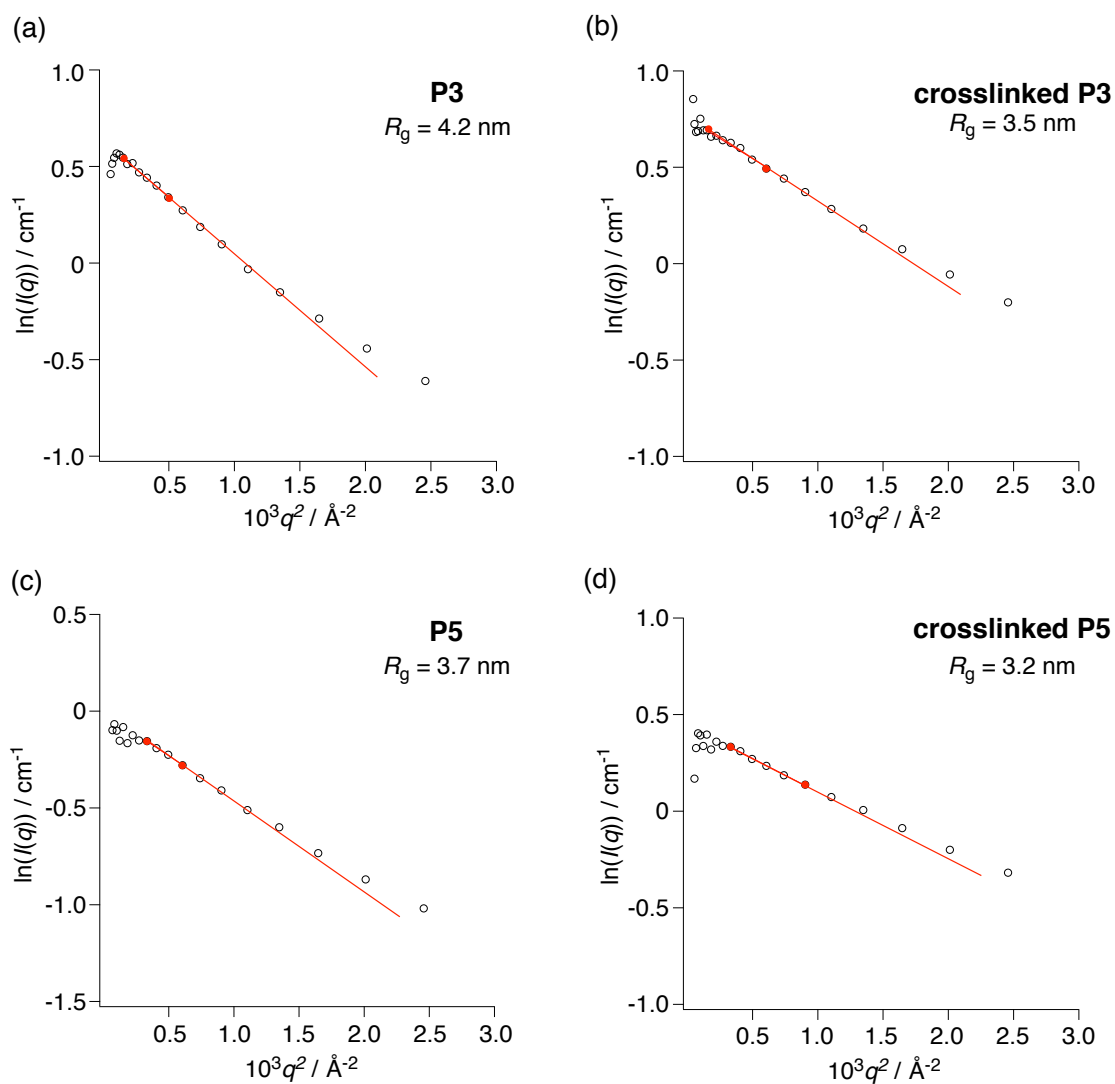

**Figure S10.** Guinier plots obtained from the SAXS profiles (Figure 6) of (a) **P3**, (b) crosslinked **P3**, (c) **P5**, and (d) crosslinked **P5** in THF- $d_8$  at 25 °C: [polymer] = 10 mg/mL.

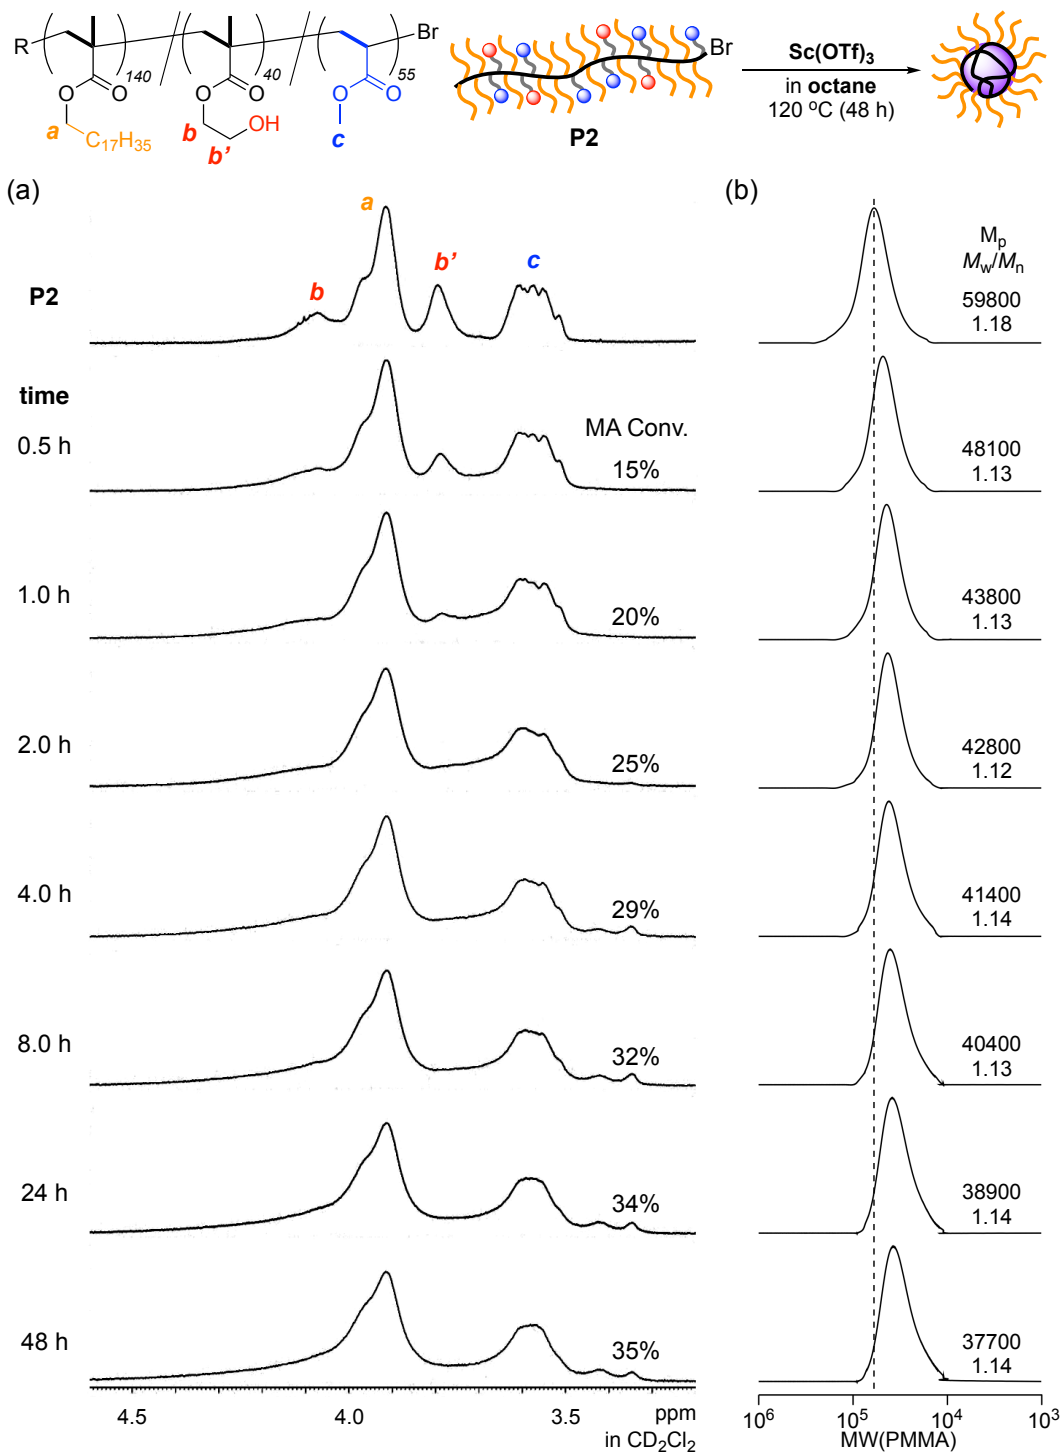

**Figure S11.** <sup>1</sup>H NMR spectra (a) and SEC curves (b) of the products obtained from the transesterification of ODMA/HEMA/MA copolymer (P2) with Sc(OTf)<sub>3</sub>: [polymer]<sub>0</sub> = 10 mg/mL (0.19 mM) and [Sc(OTf)<sub>3</sub>]<sub>0</sub> = 1.0 mM in octane at 120 °C for 0.5, 1.0, 2.0, 4.0, 8.0, 24, 48 h.

**Table S2. Synthesis and Characterization of Crosslinked P2<sup>a</sup>**

| Entry | Time (h) | $M_n^b$ (SEC) | $M_w/M_n^b$ (SEC) | $M_p/M_{p,precursor}^b$ (SEC) | $M_w^c$ (MALLS) | MA Conv. <sup>d</sup> (%) | $T_m^e$ (°C) | $\Delta H_m^e$ (J/g) | $T_c^e$ (°C) | $\Delta H_c^e$ (J/g) |
|-------|----------|---------------|-------------------|-------------------------------|-----------------|---------------------------|--------------|----------------------|--------------|----------------------|
| 1     | 0.5      | 43800         | 1.13              | 0.80                          | 64900           | 15                        | 23.3         | 23.2                 | 11.9         | 23.3                 |
| 2     | 1.0      | 40000         | 1.13              | 0.73                          | 65100           | 20                        | 33.3         | 43.9                 | 20.1         | 44.2                 |
| 3     | 2.0      | 38300         | 1.12              | 0.72                          | 63600           | 25                        | 26.3         | 24.4                 | 13.2         | 24.4                 |
| 4     | 4.0      | 35600         | 1.14              | 0.69                          | 68500           | 29                        | 30.1         | 34.1                 | 16.5         | 33.7                 |
| 5     | 8.0      | 34000         | 1.13              | 0.68                          | 66000           | 32                        | 30.4         | 34.6                 | 16.8         | 34.9                 |
| 6     | 24       | 32100         | 1.14              | 0.65                          | 70400           | 34                        | 33.8         | 38.7                 | 20.0         | 38.7                 |
| 7     | 48       | 31000         | 1.14              | 0.63                          | 73000           | 35                        | 26.8         | 25.4                 | 13.8         | 25.4                 |

<sup>a</sup> Conditions: [P2]<sub>0</sub> = 10 mg/mL, [Sc(OTf)<sub>3</sub>]<sub>0</sub> = 1.0 mM in octane at 120 °C.

<sup>b</sup> Determined by SEC in THF with PMMA standard calibration.

<sup>c</sup> Absolute weight-average molecular weight determined by SEC-MALLS in THF.

<sup>d</sup> MA conversion determined by <sup>1</sup>H NMR.

<sup>e</sup> Melting and crystallization temperature ( $T_m$ ,  $T_c$ ) and the enthalpy of melting and crystallization ( $\Delta H_m$ ,  $\Delta H_c$ ) were determined by differential scanning calorimetry (DSC). The heating and cooling rate were performed at 10 °C/min and -10 °C/min, respectively, between -80 °C and 150 °C.

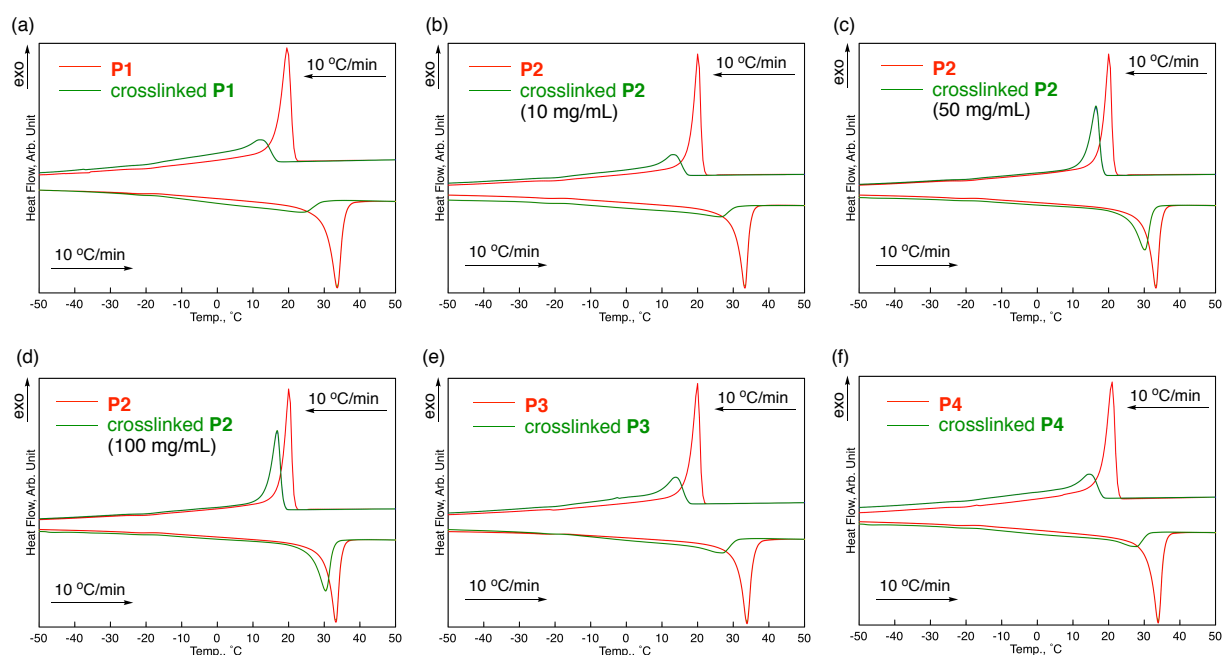

**Figure S12.** DSC thermograms of (a) P1 and crosslinked P1, (b-d) P2 and crosslinked P2 (b: 10 mg/mL, c: 50 mg/mL, d: 100 mg/mL), (e) P3 and crosslinked P3, and (f) P4 and crosslinked P4 (P1 – P4: red, their crosslinked products: green). Heating and cooling rate: 10 °C/min and -10 °C/min, respectively. Temperature range: -80 – 150 °C.
